# Supplementary material for: The zebrafish presomitic mesoderm elongates through compaction-extension
Source: PubMed Central journal article supplement (PMC7612712; doi:10.1016/j.cdev.2021.203748), 2021-09-28
Supplement: EMS140703-supplement-Supplementary_Figures.pdf [file EMS140703-supplement-Supplementary_Figures.pdf]

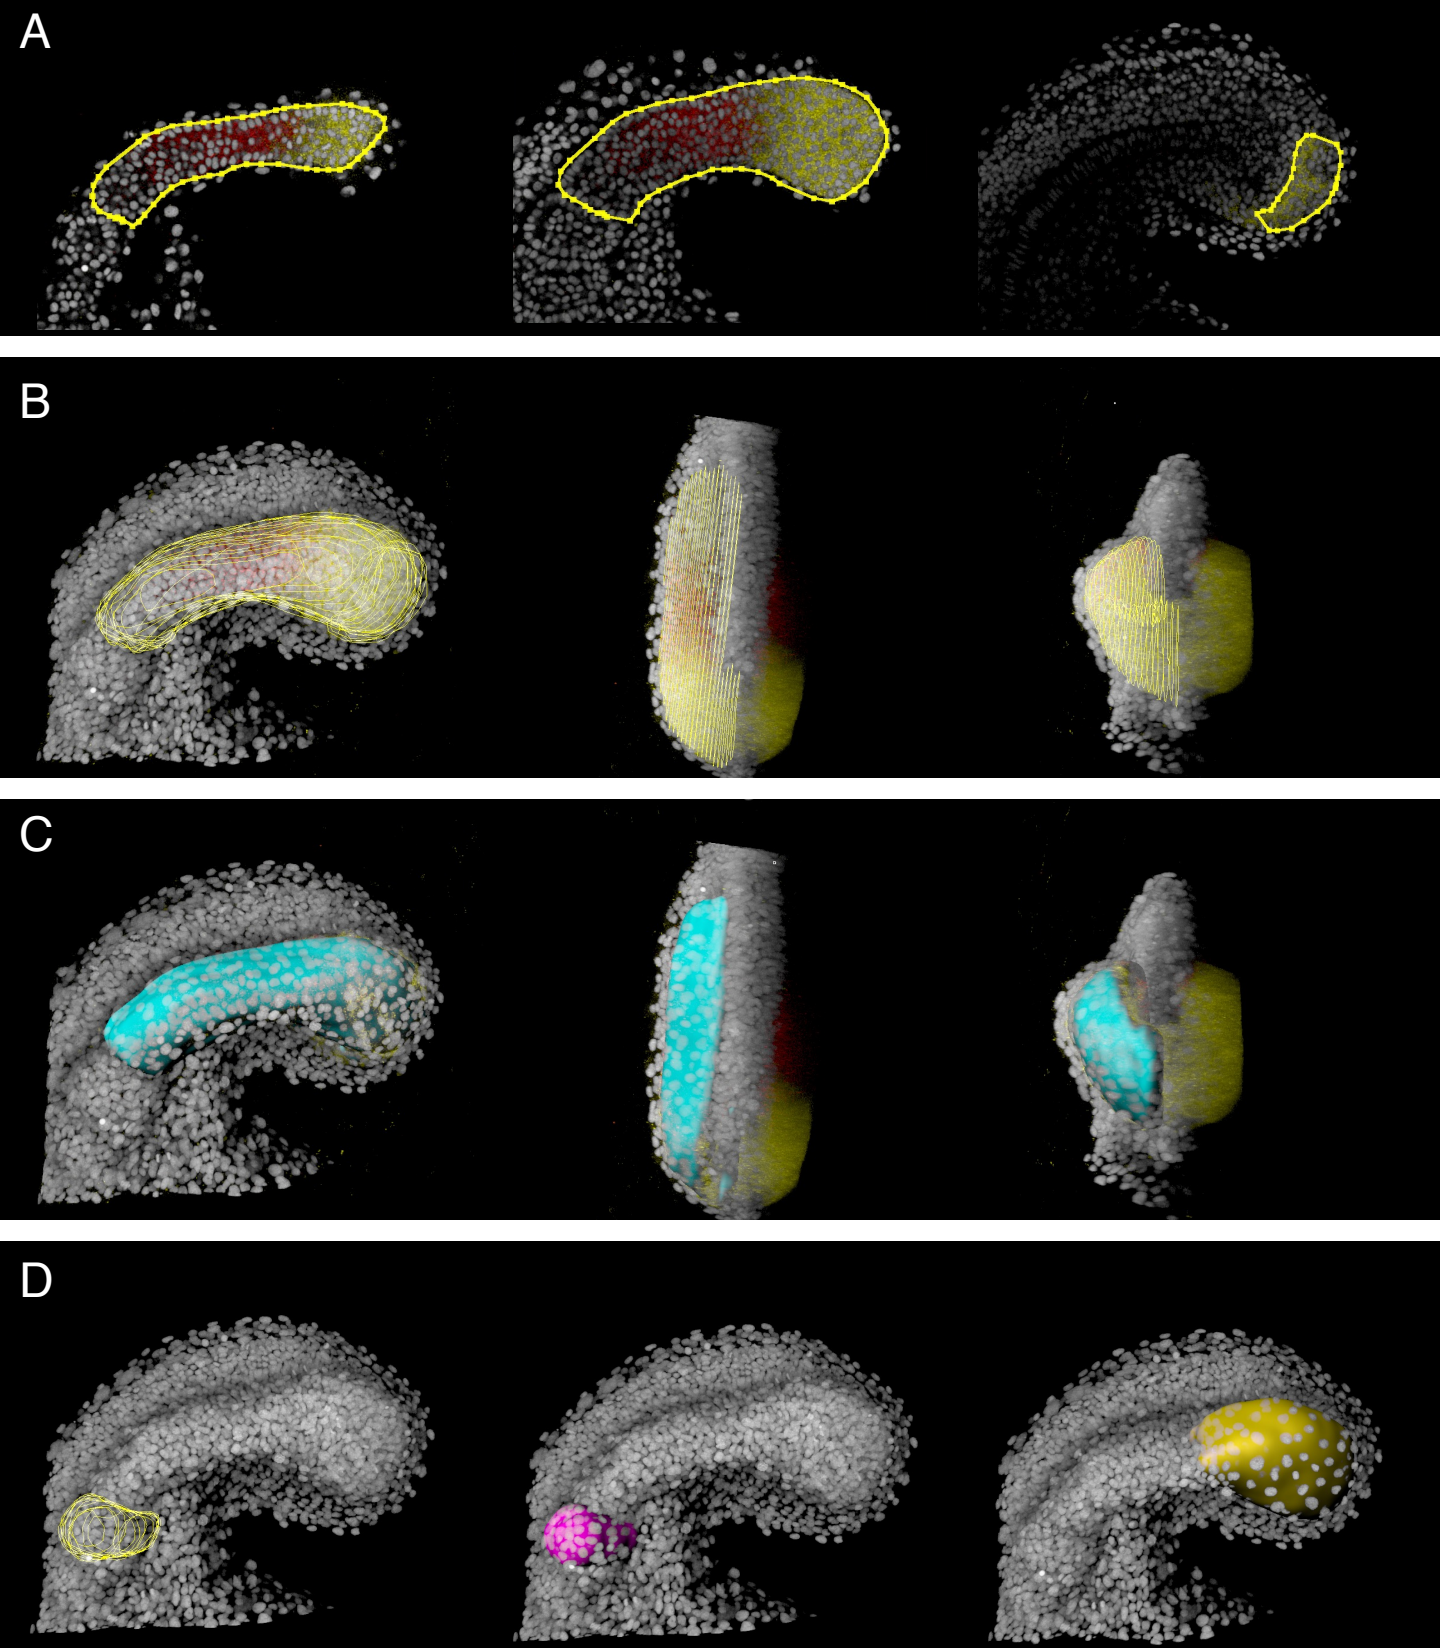

Figure S1

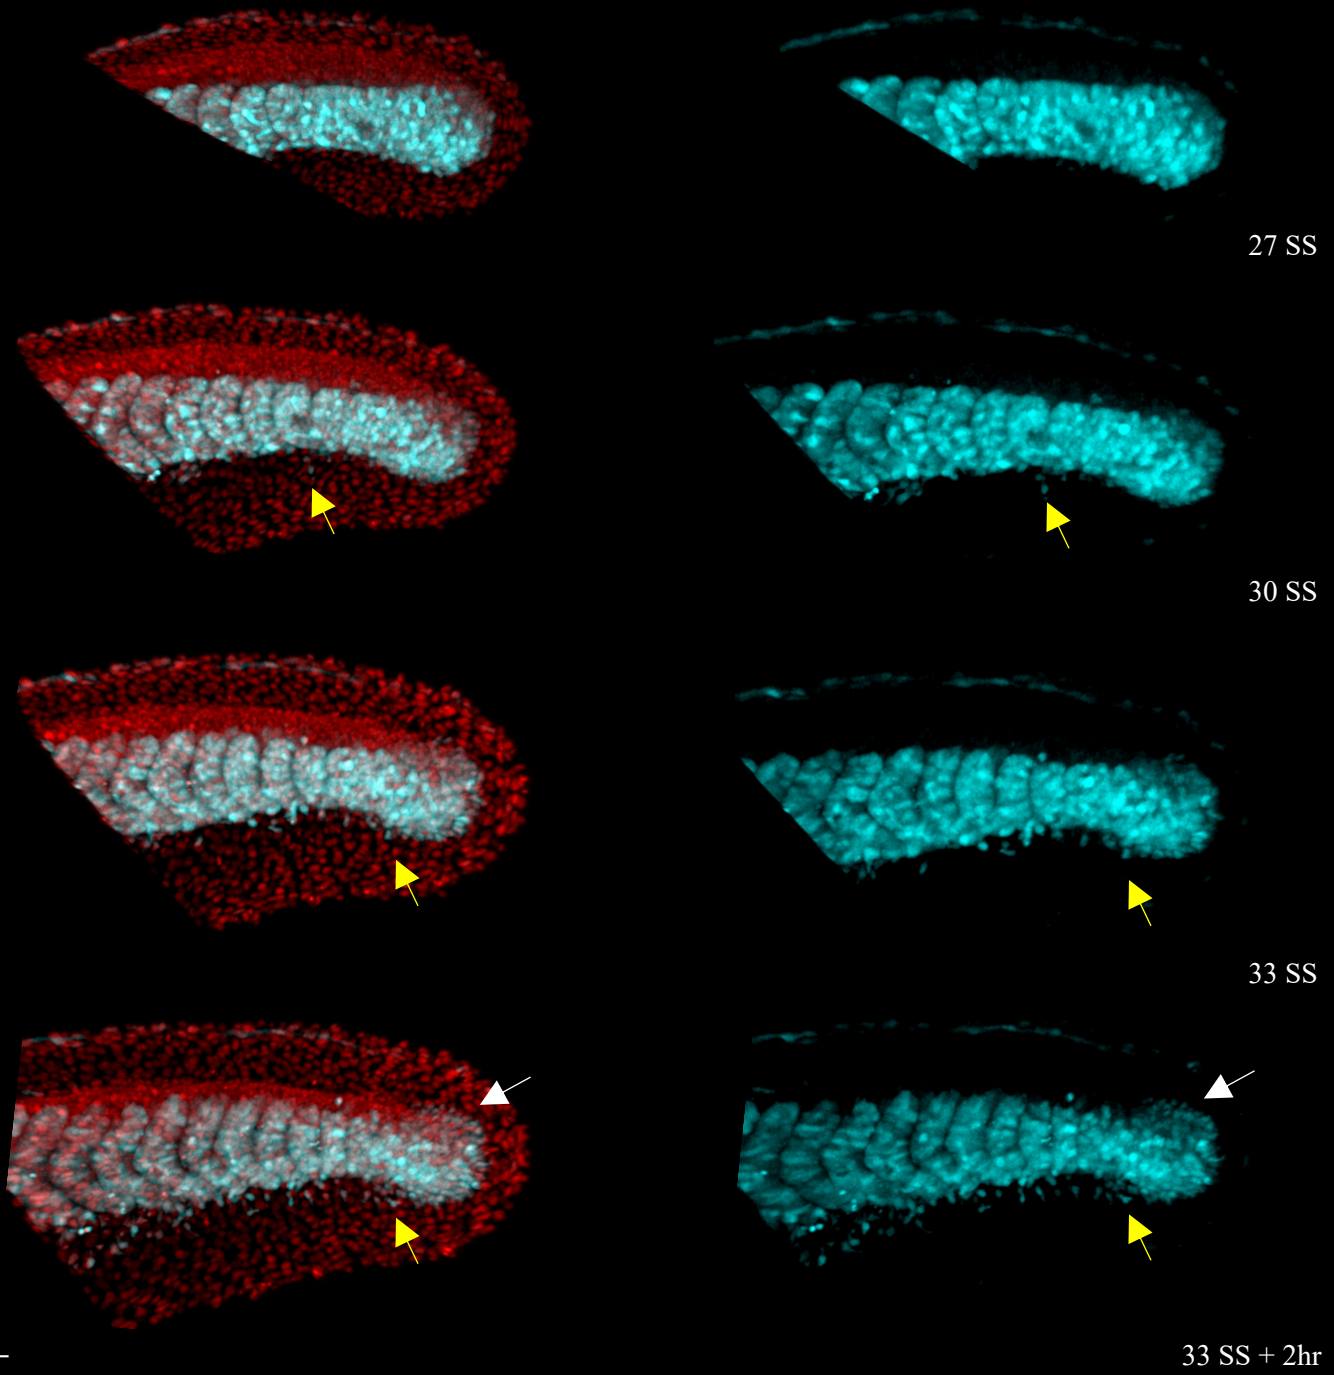

Figure S2

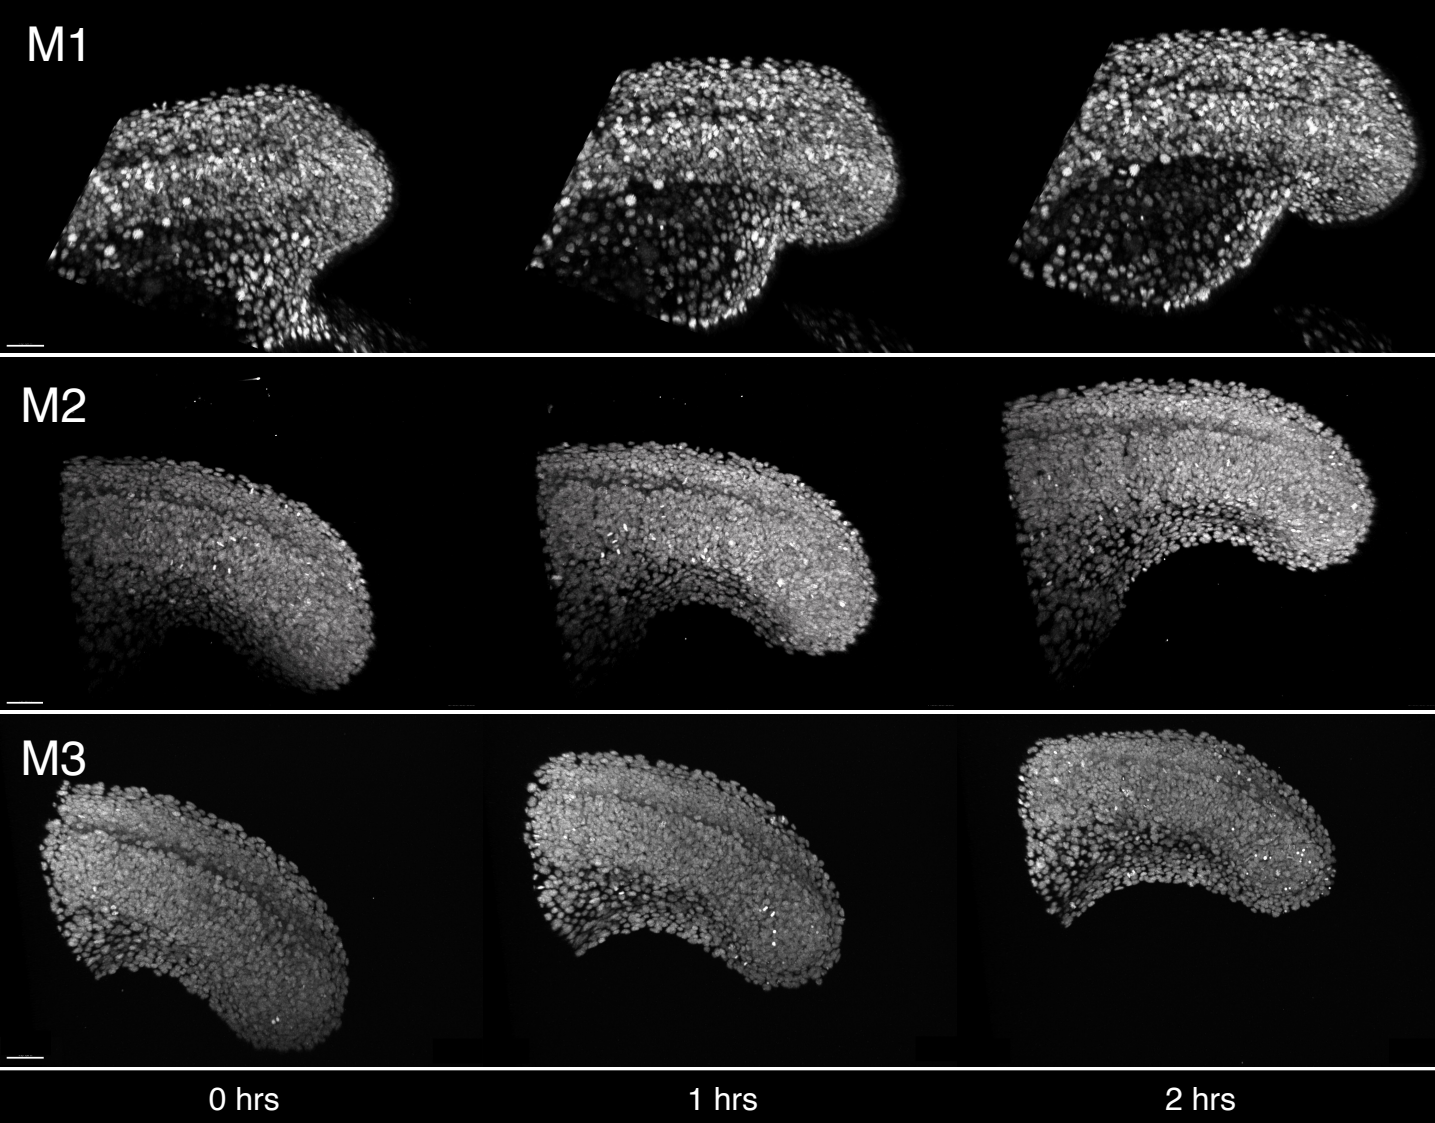

| Movie | Somite-stages | Frame interval (s) | Nuclear label       |
|-------|---------------|--------------------|---------------------|
| M1    | 14 - 20       | 70                 | <i>h2a::mCherry</i> |
| M2    | 18 - 22       | 180                | <i>h2b::GFP</i>     |
| M3    | 22 - 26       | 150                | <i>h2b::GFP</i>     |

Figure S3



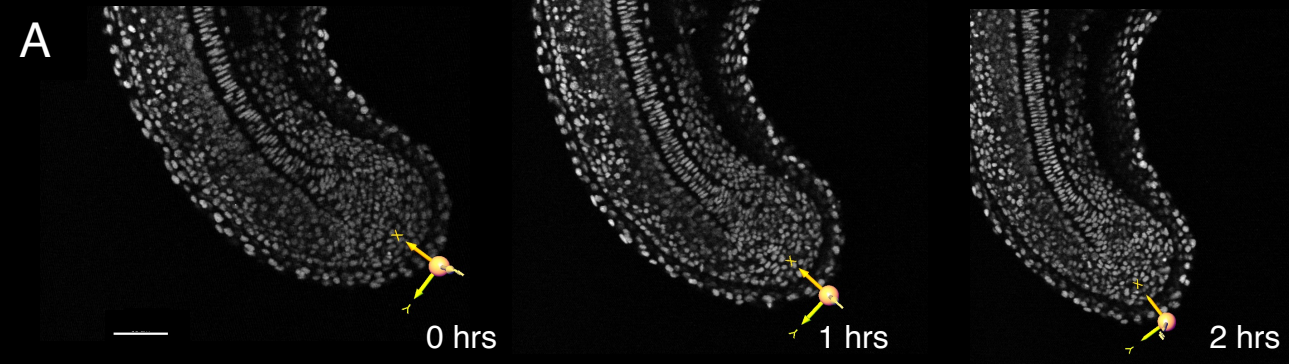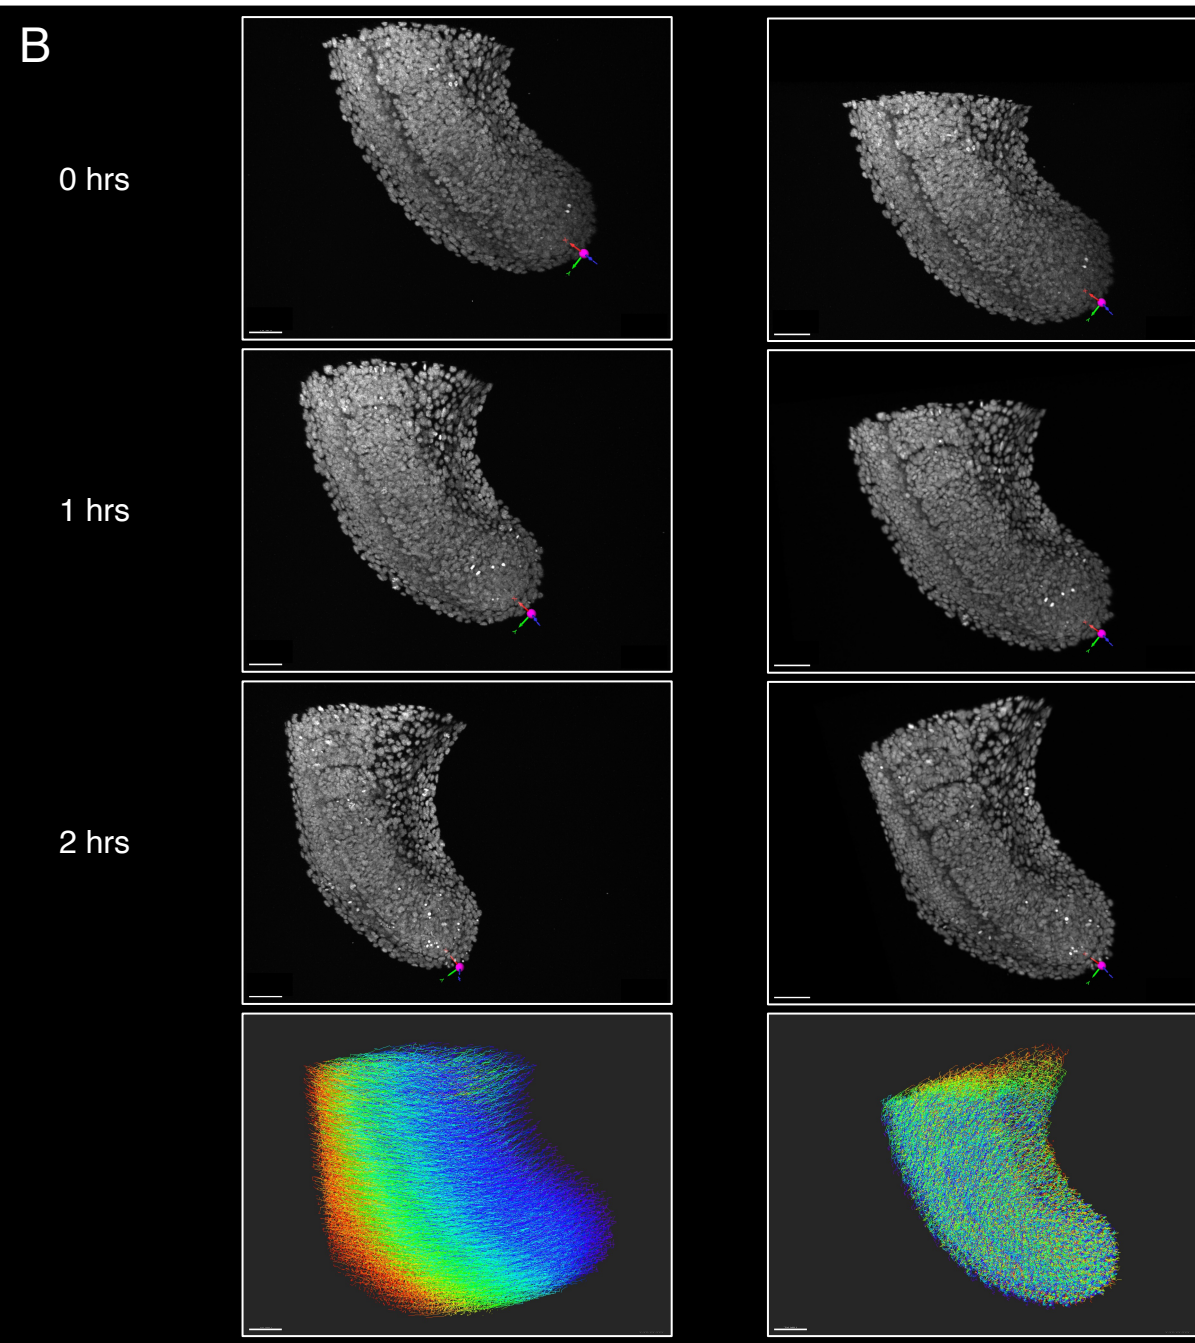

Figure S4



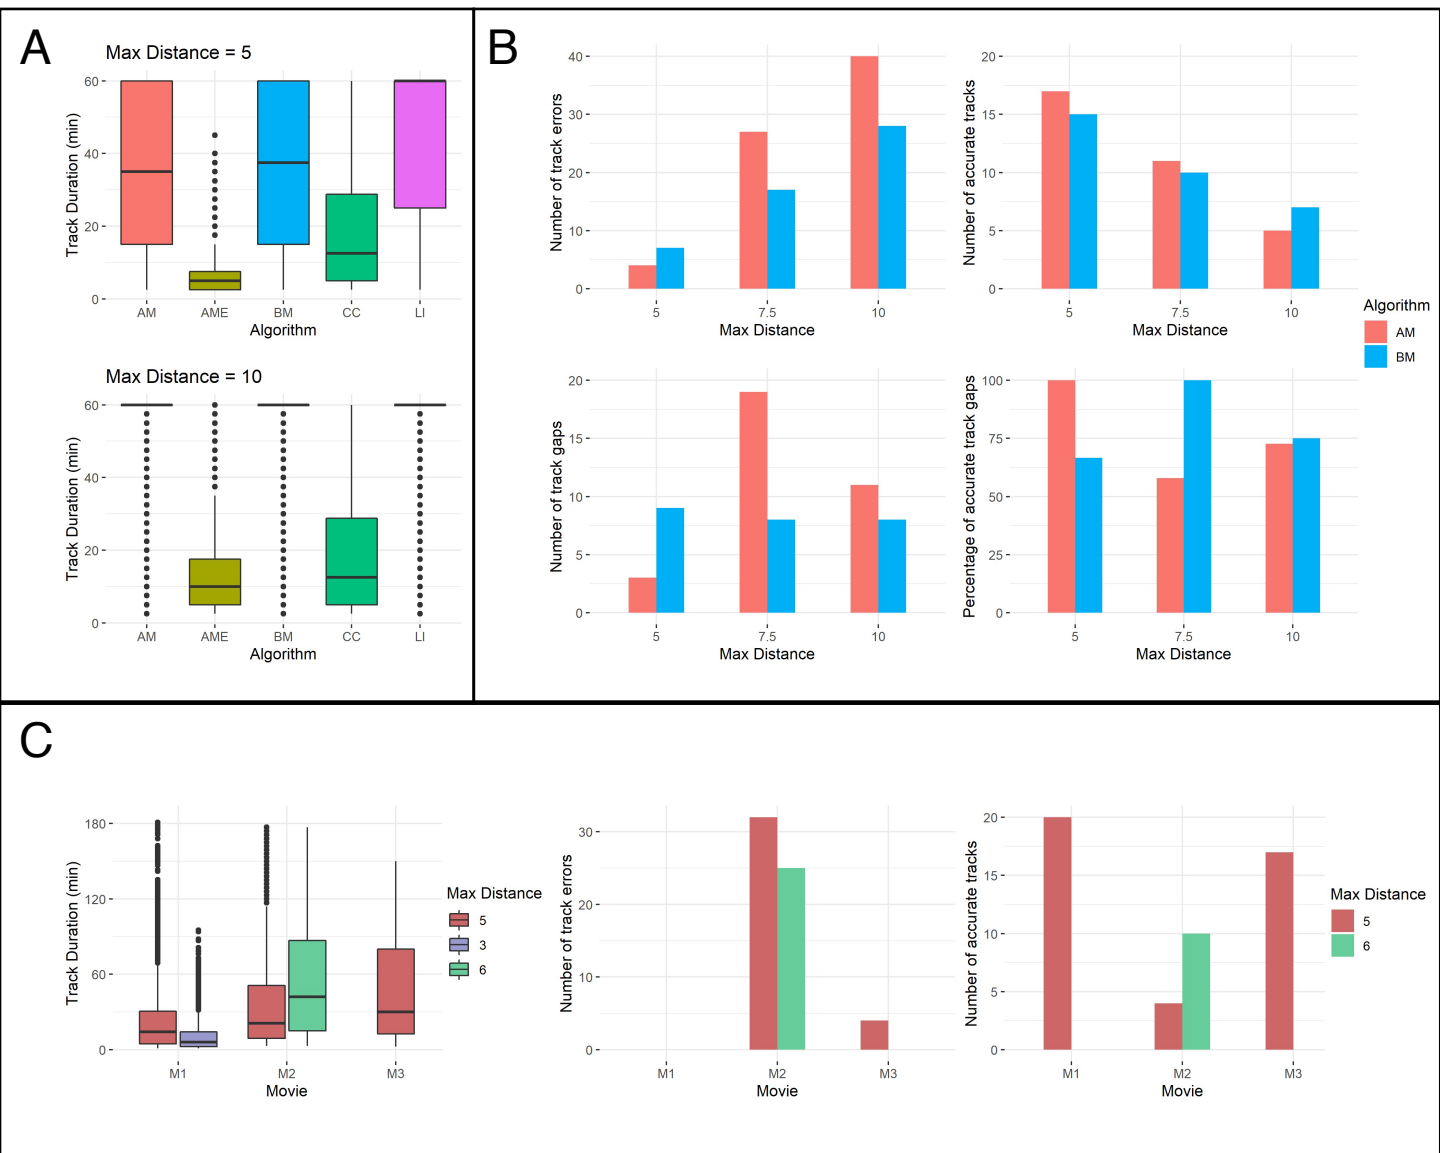

Figure S5

**A**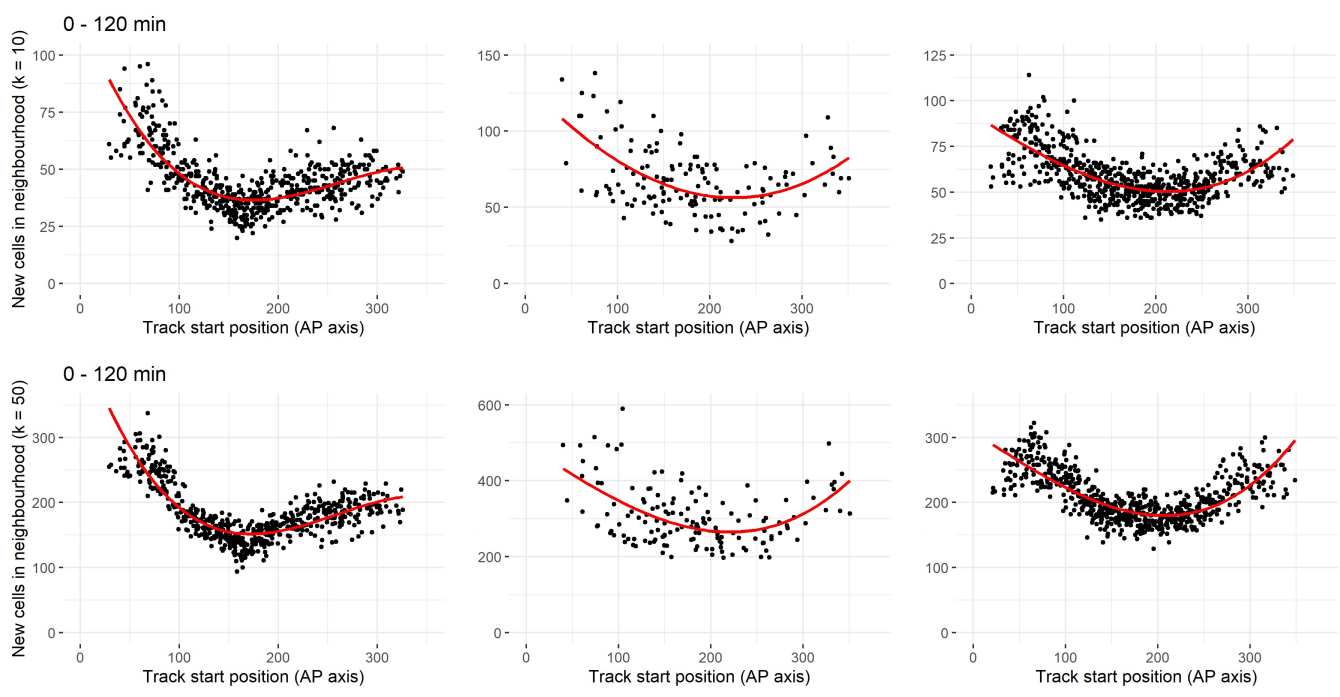**B**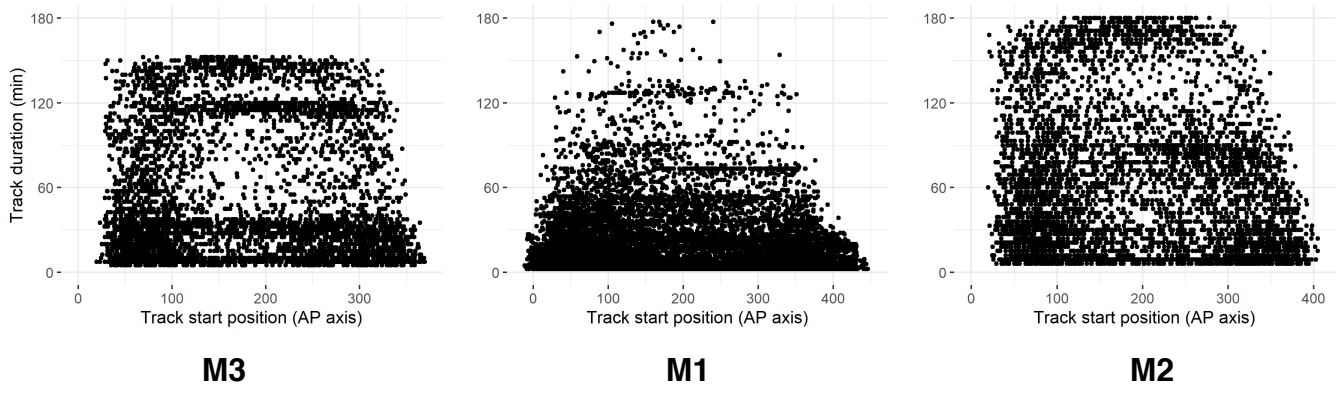**Figure S6**

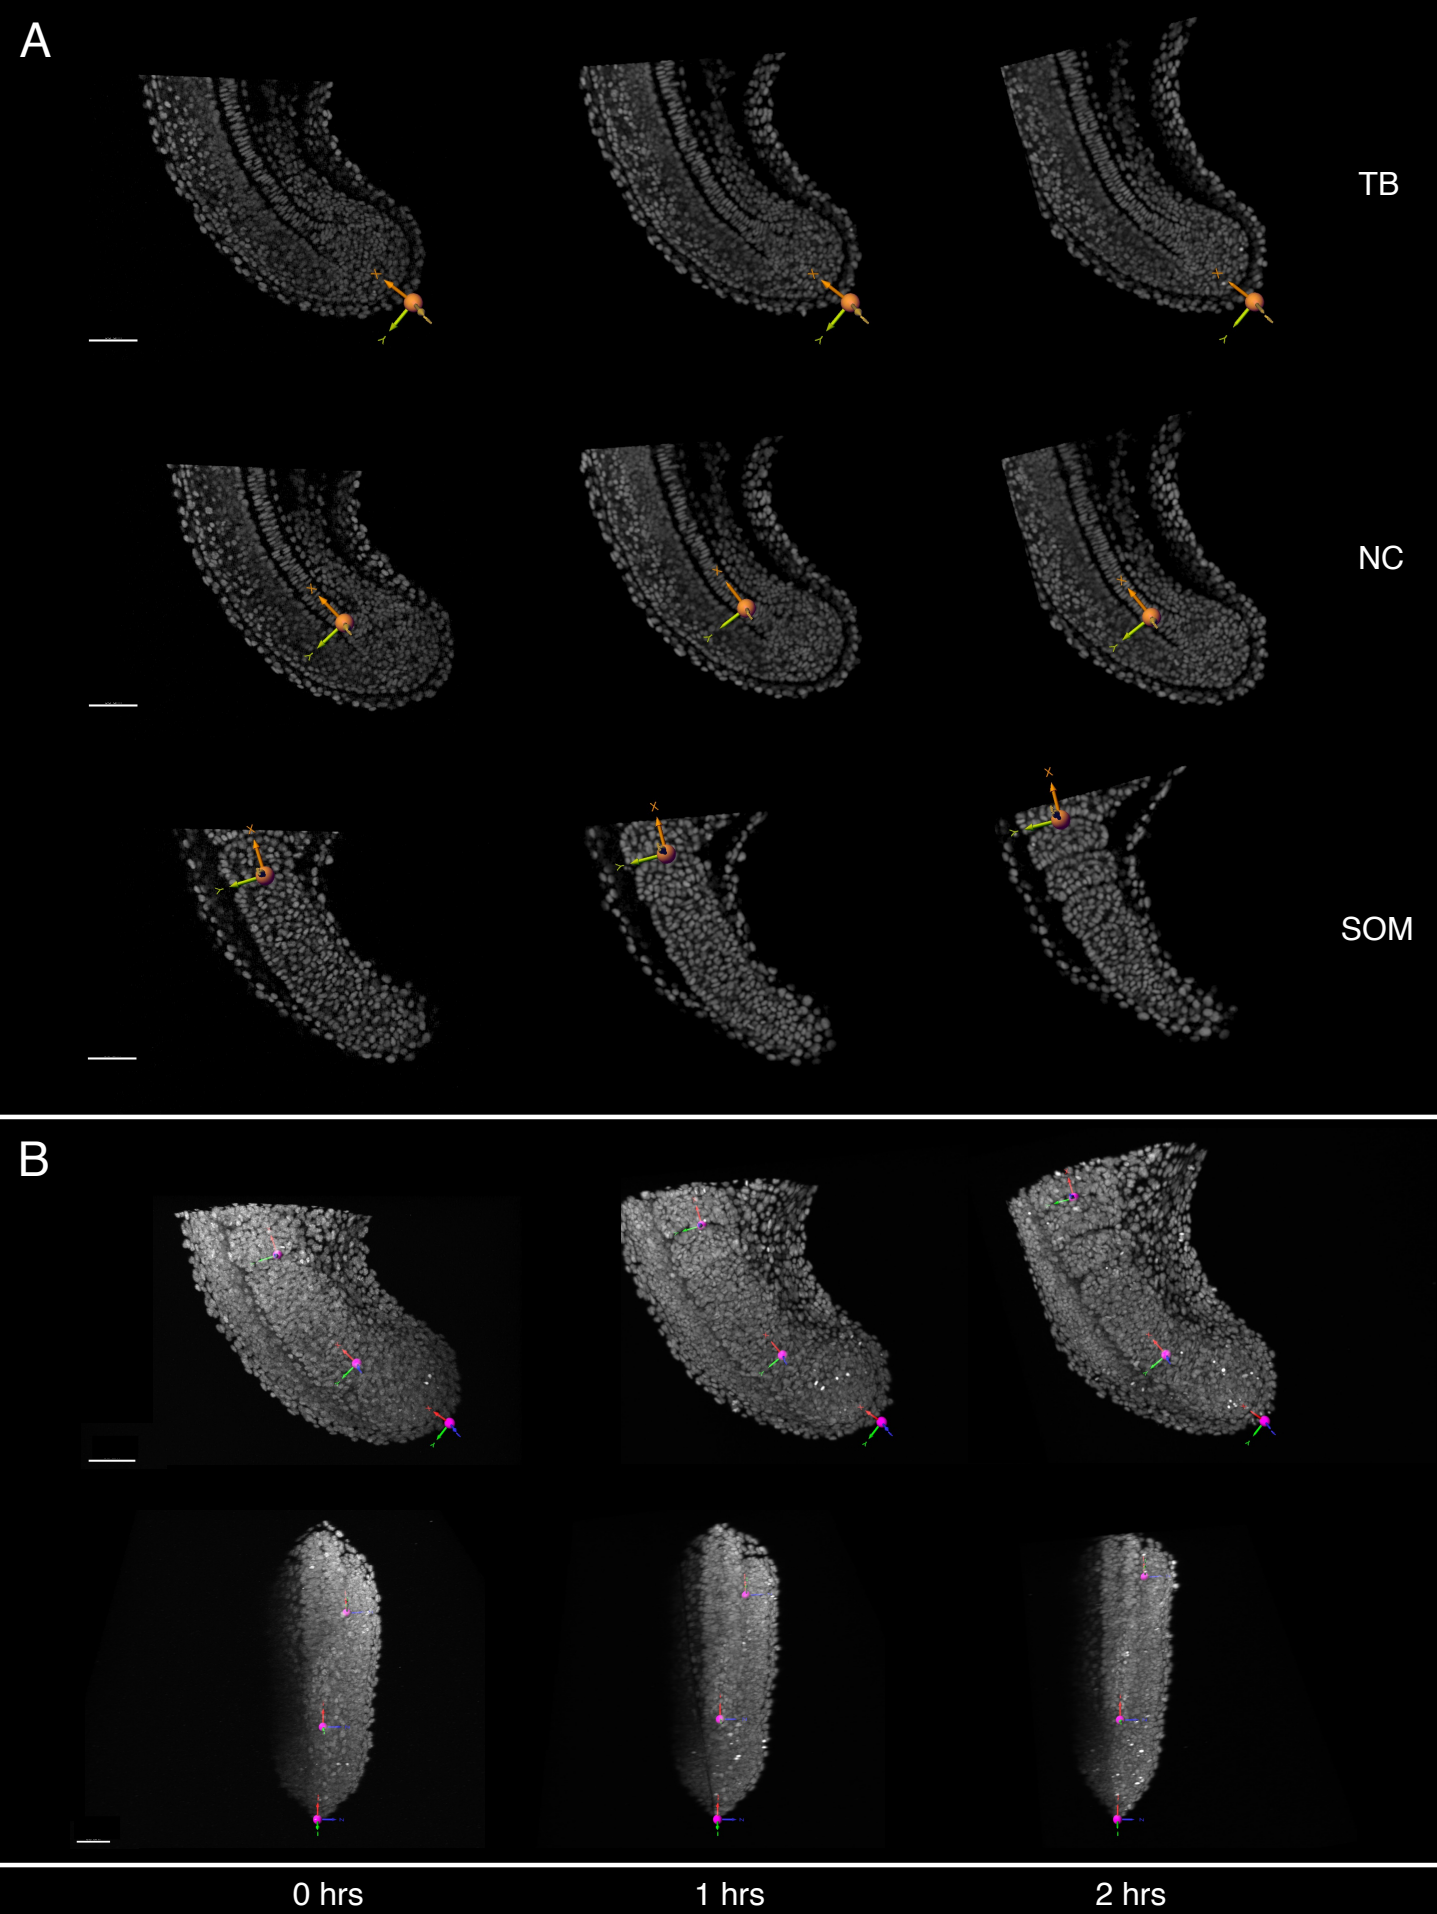

Figure S7



M3

A

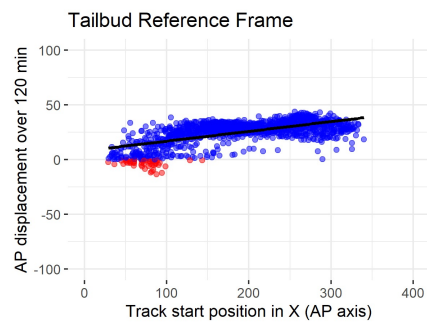

B

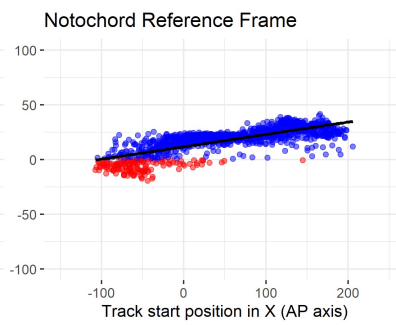

C

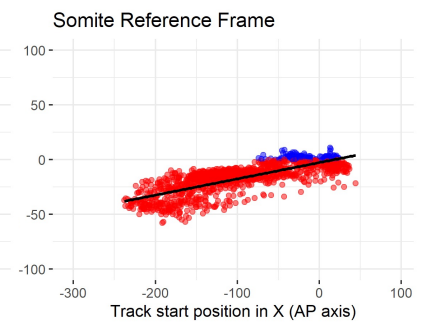

M1

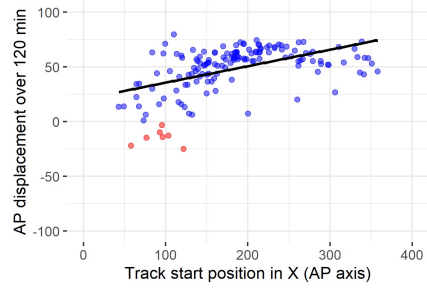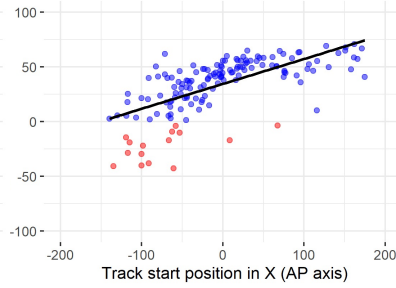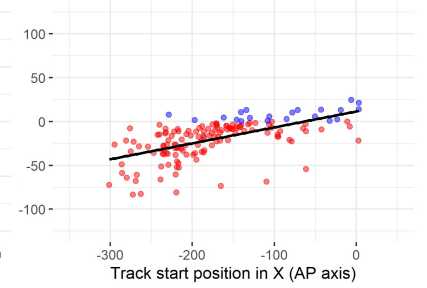

M2

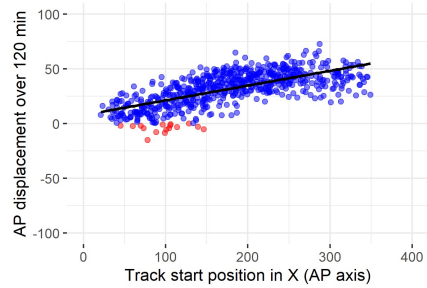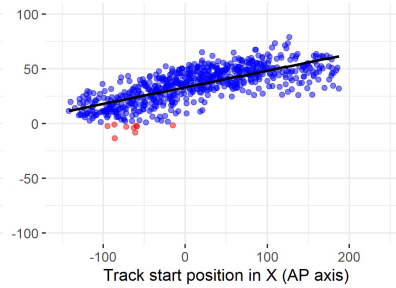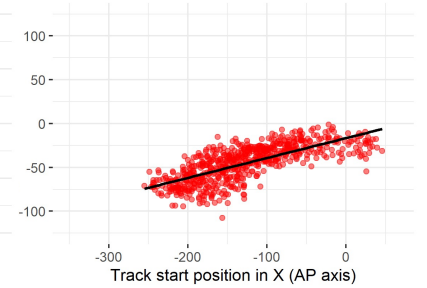

Displacement type    • anterior    • posterior

Figure S8
